# Supplementary material for: The Influence of the Dilution Rate on the Aggressiveness of Inocula and the Expression of Resistance against Fusarium Head Blight in Wheat
Source: PubMed Central journal article supplement (PMC7465623; doi:10.3390/plants9080943), 2020-07-25
Supplement: plants-09-00943-s001.pdf [file plants-09-00943-s001.pdf]

## Supplementary materials:

**Table S1.** Aggressiveness tests for the isolates used in 2013 on two genotypes differing in seedling resistance. 25 seeds were tested in a Petri dish in 5 × 5 binding. The number of healthy germs were counted daily from the 2nd to 6th day. Normal (without dilution) concentration and 1:1, 1:2, and 1:4 dilutions were used.

| Isolate               | Variety 1 S          | Days after Sowing / No. of Healthy Germs |    |    |    |    | Mean | % to Check |
|-----------------------|----------------------|------------------------------------------|----|----|----|----|------|------------|
|                       |                      | 2                                        | 3  | 4  | 5  | 6  |      |            |
| <b>Fc 12375/ 2013</b> | No dilution          | 0                                        | 0  | 0  | 0  | 0  | 0    | 0.00       |
|                       | 1:1                  | 0                                        | 0  | 0  | 0  | 0  | 0    | 0.00       |
|                       | 1:2                  | 0                                        | 0  | 0  | 0  | 0  | 0    | 0.00       |
|                       | 1:4                  | 0                                        | 0  | 0  | 0  | 0  | 0    | 0.00       |
|                       | Check                | 23                                       | 24 | 24 | 24 | 24 | 23.8 | 100.00     |
|                       | Mean % for dilutions |                                          |    |    |    |    | 0    | 0.00       |
|                       | Variety 2 MS         | Days after sowing / No. of healthy germs |    |    |    |    | Mean | % to check |
|                       |                      | 2                                        | 3  | 4  | 5  | 6  |      |            |
|                       | No dilution          | 0                                        | 0  | 0  | 0  | 0  | 0    | 0.00       |
|                       | 1:1                  | 0                                        | 0  | 0  | 0  | 0  | 0    | 0.00       |
|                       | 1:2                  | 0                                        | 0  | 0  | 0  | 0  | 0    | 0.00       |
|                       | 1:4                  | 0                                        | 0  | 0  | 0  | 0  | 0    | 0.00       |
|                       | Check                | 22                                       | 23 | 24 | 24 | 24 | 23.4 | 100.00     |
|                       | Mean % for dilutions |                                          |    |    |    |    |      | 0.00       |
|                       | Variety 1 S          | Days after sowing / No. of healthy germs |    |    |    |    | Mean | % to check |
|                       |                      | 2                                        | 3  | 4  | 5  | 6  |      |            |
| <b>Fc 52.10 2013</b>  | No dilution          | 0                                        | 0  | 0  | 0  | 0  | 0    | 0.00       |
|                       | 1:1                  | 0                                        | 0  | 0  | 0  | 0  | 0    | 0.00       |
|                       | 1:2                  | 0                                        | 0  | 0  | 0  | 0  | 0    | 0.00       |
|                       | 1:4                  | 7                                        | 8  | 8  | 8  | 8  | 7.8  | 32.77      |
|                       | Check                | 23                                       | 24 | 24 | 24 | 24 | 23.8 | 100.00     |
|                       | Mean % for dilutions |                                          |    |    |    |    |      | 8.19       |
|                       | Variety 2 MS         | Days after sowing / No. of healthy germs |    |    |    |    | Mean | % to check |
|                       |                      | 2                                        | 3  | 4  | 5  | 6  |      |            |
|                       | No dilution          | 0                                        | 0  | 0  | 0  | 0  | 0    | 0.00       |
|                       | 1:1                  | 0                                        | 0  | 0  | 0  | 0  | 0    | 0.00       |
|                       | 1:2                  | 1                                        | 2  | 3  | 3  | 3  | 2.4  | 10.26      |
|                       | 1:4                  | 9                                        | 9  | 8  | 8  | 8  | 8.4  | 35.90      |
|                       | Check                | 22                                       | 23 | 24 | 24 | 24 | 23.4 | 100.00     |
|                       | Mean % for dilutions |                                          |    |    |    |    |      | 11.54      |
|                       | Variety 1 S          | Days after sowing / No. of healthy germs |    |    |    |    | Mean | % to check |
|                       |                      | 2                                        | 3  | 4  | 5  | 6  |      |            |
| <b>Fg 19.42 2013</b>  | No dilution          | 2                                        | 0  | 0  | 0  | 0  | 0.4  | 1.68       |
|                       | 1:1                  | 2                                        | 2  | 1  | 1  | 1  | 1.4  | 5.88       |
|                       | 1:2                  | 11                                       | 7  | 2  | 2  | 2  | 4.8  | 20.17      |
|                       | 1:4                  | 14                                       | 9  | 4  | 4  | 4  | 7    | 29.41      |
|                       | Check                | 23                                       | 24 | 24 | 24 | 24 | 23.8 | 100.00     |
|                       | Mean % for dilutions |                                          |    |    |    |    |      | 14.29      |
|                       | Variety 2 MS         | Days after sowing / No. Of healthy germs |    |    |    |    | Mean | % to check |
|                       |                      | 2                                        | 3  | 4  | 5  | 6  |      |            |
|                       | No dilution          | 1                                        | 0  | 0  | 0  | 0  | 0.2  | 0.85       |
|                       | 1:1                  | 4                                        | 1  | 1  | 1  | 1  | 1.6  | 6.84       |
|                       | 1:2                  | 6                                        | 5  | 3  | 3  | 3  | 4    | 17.09      |
|                       | 1:4                  | 12                                       | 9  | 6  | 6  | 6  | 7.8  | 33.33      |
|                       | Check                | 22                                       | 23 | 24 | 24 | 24 | 23.4 | 100.00     |

| Variety 1                      |             | Days after sowing / No. of healthy germs |    |    |    |    | Mean  | % to   |
|--------------------------------|-------------|------------------------------------------|----|----|----|----|-------|--------|
| S                              |             | 2                                        | 3  | 4  | 5  | 6  | check |        |
| <b>Fg 13.38</b><br><b>2013</b> | No dilution | 0                                        | 0  | 0  | 0  | 0  | 0     | 0.00   |
|                                | 1:1         | 3                                        | 1  | 0  | 0  | 0  | 0.8   | 3.36   |
|                                | 1:2         | 6                                        | 5  | 3  | 3  | 3  | 4     | 16.81  |
|                                | 1:4         | 14                                       | 9  | 8  | 8  | 8  | 9.4   | 39.50  |
|                                | Check       | 23                                       | 24 | 24 | 24 | 24 | 23.8  | 100.00 |
| Mean % for dilutions           |             |                                          |    |    |    |    |       | 14.92  |
| Variety 2 MS                   |             | Days after sowing / No. of healthy germs |    |    |    |    | Mean  | % to   |
| S                              |             | 2                                        | 3  | 4  | 5  | 6  | check |        |
|                                | No dilution | 2                                        | 1  | 1  | 1  | 1  | 1.2   | 5.13   |
|                                | 1:1         | 3                                        | 3  | 3  | 2  | 2  | 2.6   | 11.11  |
|                                | 1:2         | 11                                       | 8  | 6  | 5  | 4  | 6.8   | 29.06  |
|                                | 1:4         | 8                                        | 6  | 6  | 6  | 3  | 5.8   | 24.79  |
|                                | Check       | 22                                       | 23 | 24 | 24 | 24 | 23.4  | 100.00 |
| Mean % for dilutions           |             |                                          |    |    |    |    |       | 17.52  |
| Variety 1                      |             | Days after sowing / No. of healthy germs |    |    |    |    | Mean  | % to   |
| S                              |             | 2                                        | 3  | 4  | 5  | 6  | check |        |
| <b>Fg 46.06</b><br><b>2013</b> | No dilution | 12                                       | 8  | 8  | 8  | 8  | 8.8   | 36.97  |
|                                | 1:1         | 20                                       | 18 | 18 | 18 | 18 | 18.4  | 77.31  |
|                                | 1:2         | 21                                       | 21 | 21 | 21 | 21 | 21    | 88.24  |
|                                | 1:4         | 19                                       | 19 | 19 | 19 | 19 | 19    | 79.83  |
|                                | Check       | 23                                       | 24 | 24 | 24 | 24 | 23.8  | 100.00 |
| Mean % for dilutions           |             |                                          |    |    |    |    |       | 70.59  |
| Variety 2 MS                   |             | Days after sowing / No. of healthy germs |    |    |    |    | Mean  | % to   |
| S                              |             | 2                                        | 3  | 4  | 5  | 6  | check |        |
|                                | No dilution | 15                                       | 14 | 13 | 13 | 13 | 13.6  | 58.12  |
|                                | 1:1         | 14                                       | 13 | 13 | 13 | 13 | 13.2  | 56.41  |
|                                | 1:2         | 21                                       | 18 | 18 | 18 | 18 | 18.6  | 79.49  |
|                                | 1:4         | 23                                       | 21 | 21 | 21 | 21 | 21.4  | 91.45  |
|                                | Check       | 22                                       | 23 | 24 | 24 | 24 | 23.4  | 100.00 |
| Mean % for dilutions           |             |                                          |    |    |    |    |       | 71.37  |

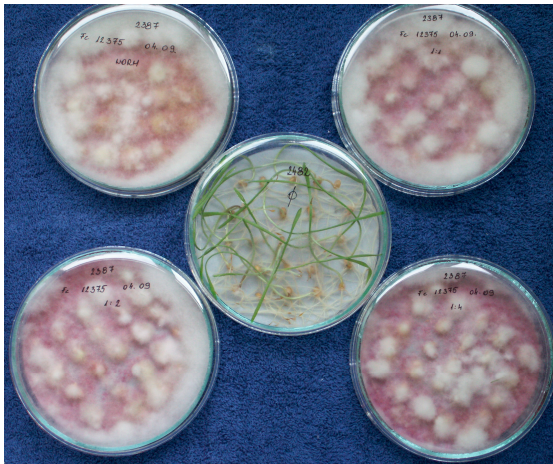

Fc 12375

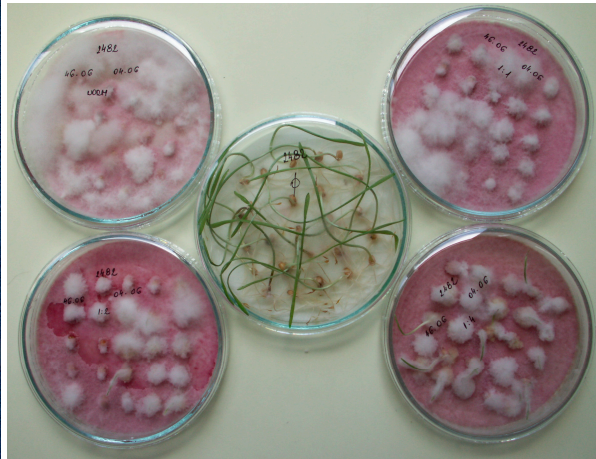

Fg 46.06

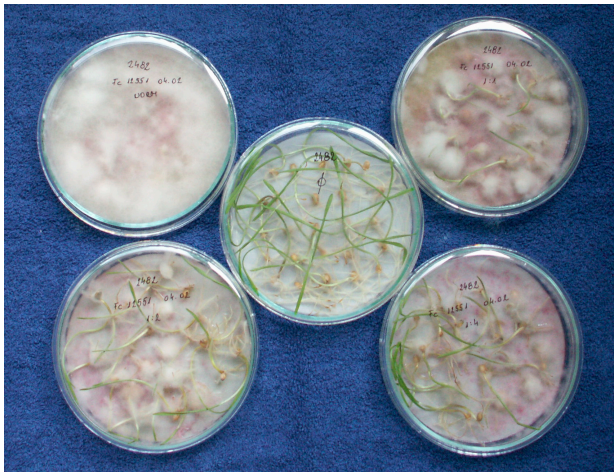

Fc 12551

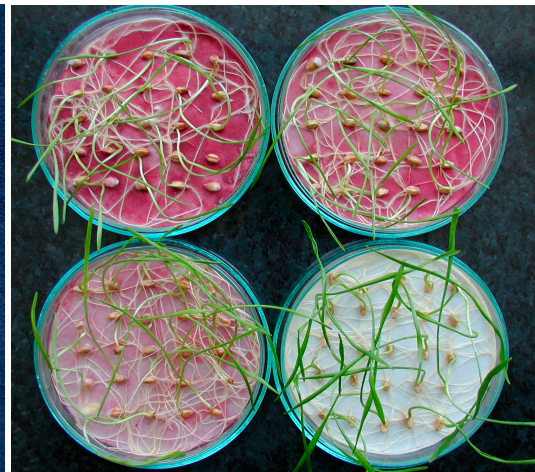

F. avenaceum 17

**Figure S1.** Petri dish aggressiveness test at different aggressiveness. The pictures are from another year, and demonstrate the aggressiveness differences that are shown by the data in Table S1. Left upper corner: original concentration, right upper: dilution 1:1, lower left: dilution 1:2, low right: dilution 1:4, in the middle non-inoculated check. For *F. avenaceum*, the 1:8 dilution was absent.
